# Supplementary material for: Melanopsin (Opn4) utilizes Gαi and Gβγ as major signal transducers
Source: Oxford University Press journal article supplement (doi:10.1242/jcs.212910), 2018-06-01
Supplement: jcs212910supp.pdf [file jcs212910supp.pdf]

## Supplemental materials

Figure S1

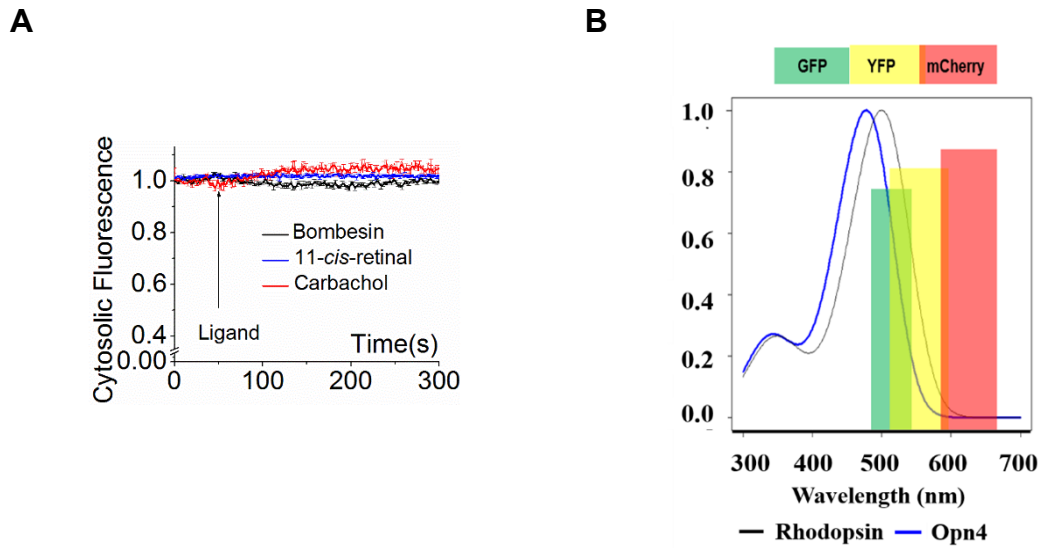

**Fig. S1: (A) Without expressing corresponding receptors, the cognate ligands do not induce  $\text{PIP}_2$  hydrolysis in HeLa cells.** Cytosolic mCherry-PH fluorescence in HeLa cells after addition of Opn4, M3, and GRP receptors agonists without transfecting their respective receptors. Average curves plotted using  $n=10$  cells from  $\geq 3$  independent experiments. Error bars: SEM. **(B) Broad absorption profile of Opn4 allow activation by blue (445nm), green (488nm), and yellow (515nm) light.** Simulated absorption spectrum of Opn4, showing that wavelengths below  $\sim 590\text{nm}$  can activate it.

Figure S2

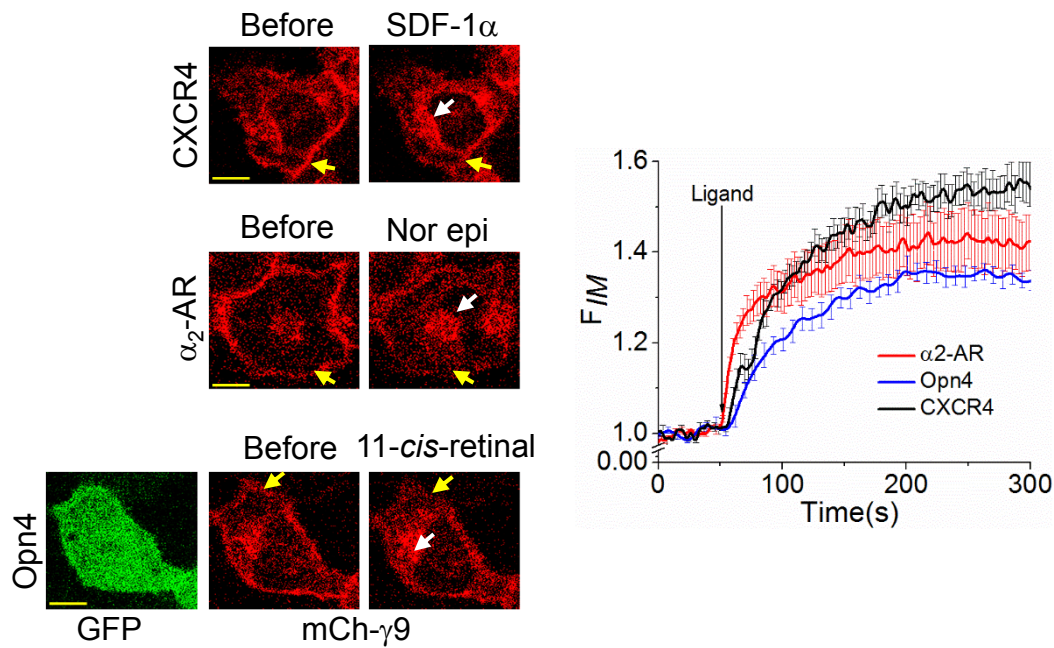

**Fig. S2: Opm4 induces comparable mCherry- $\gamma_9$  translocation to G<sub>i</sub>-coupled CXCR4 and  $\alpha_2$ -AR.** mCherry- $\gamma_9$  translocation in HeLa cells after addition of 50ng/ mL SDF-1 $\alpha$  (top), 100 $\mu$ M norepinephrine (middle) to activate their respective receptors (CXCR4,  $\alpha_2$ -AR) endogenously expressed, 50 $\mu$ M 11-*cis*-retinal added, imaged for mCherry and YFP to photoactivate bi-cistronic Opm4 GFP (bottom) transiently transfected in HeLa. Yellow arrows (PM), white arrows (IMs). Scale bar 10 $\mu$ m. Average curves plotted using n=10 cells from  $\geq 3$  independent experiments. Error bars: SEM.

Figure S3

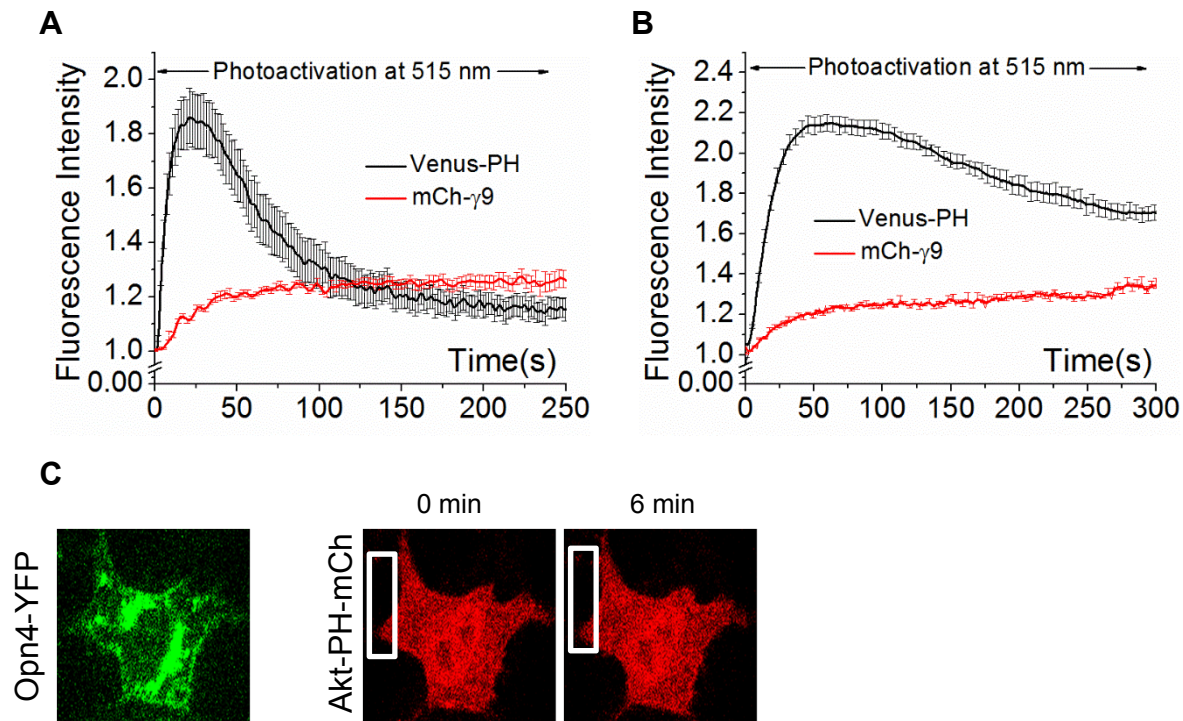

**Fig. S3: (A,B) Control cells show PIP<sub>2</sub> hydrolysis and  $\gamma_9$  translocation upon Opn4 activation.** PIP<sub>2</sub> hydrolysis and G $\gamma_9$  translocation in HeLa cells treated with vehicle solvent used to dissolve A. PTx and B. YM-254890 after activation of Opn4. Average curves plotted using n=8 cells from  $\geq 3$  independent experiments. Error bars: SEM. (C) PIP<sub>3</sub> generation in RAW264.7 in the presence of 50  $\mu$ M gallein after photoactivating Opn4-YFP supplemented with 11-*cis*-retinal.

Figure S4

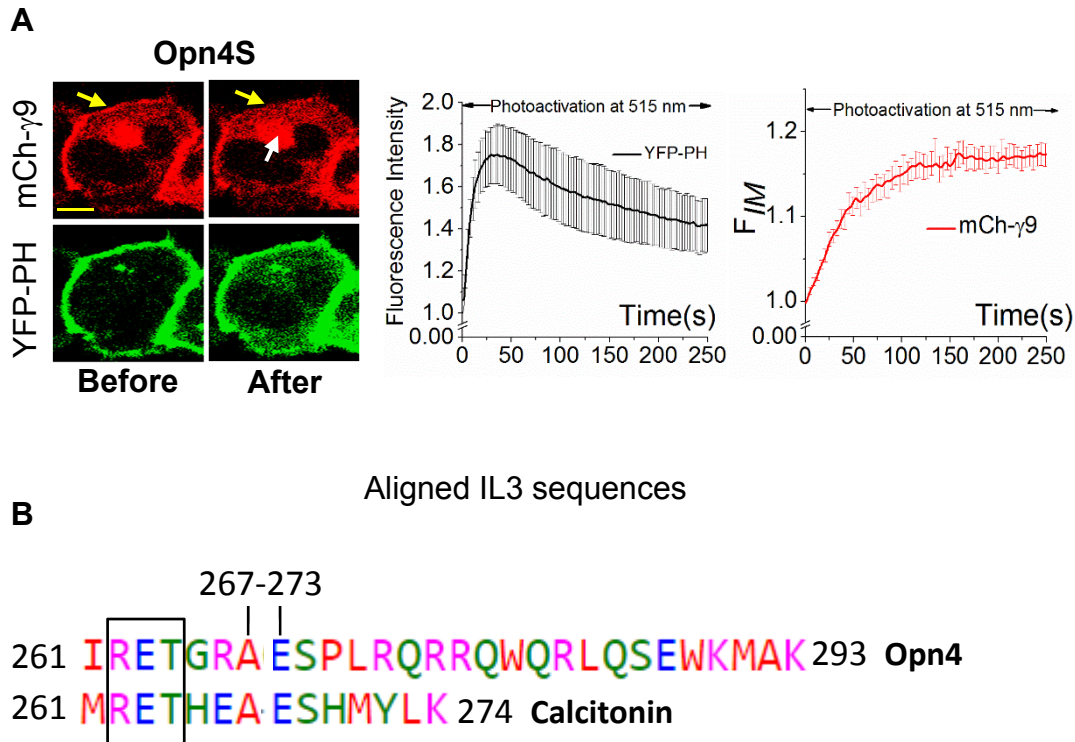

**Fig. S4: (A) Similar to Opn4, Opn4S also induced  $PIP_2$  hydrolysis and  $G_{\gamma}$  translocation.**  $PIP_2$  hydrolysis and  $G_{\gamma}$  translocation in HeLa cells after activation of Opn4S. Yellow arrows (PM), white arrows (IMs). **(B) IL3 Sequence alignments of Opn4 with  $G_q$  receptor IL3 regions that are clustered together in phylogenetic analysis.** Sequence alignment for Opn4 and  $G_q$ -coupled calcitonin receptors. Mutations in B-box resulted in a non-functional receptor. Average curves plotted using  $n \geq 10$  cells from  $\geq 3$  independent experiments. Error bars: SEM.

## Supplementary Movies

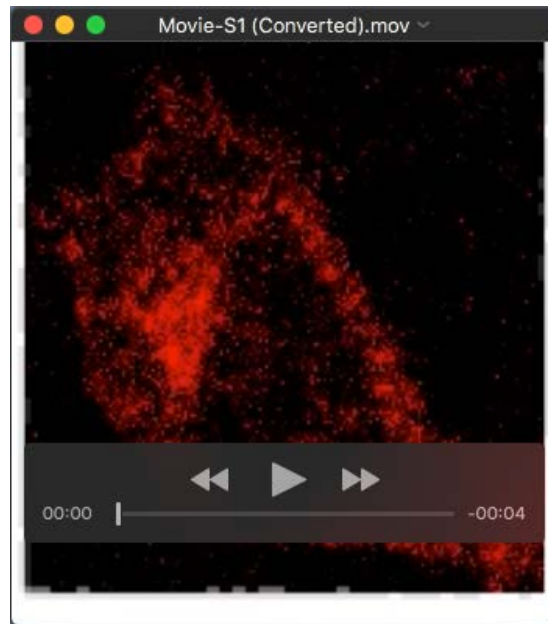

**Movie-S1.** A HeLa cell expressing Opn4 and PIP<sub>2</sub> sensor (Venus-PH) shows profound PIP<sub>2</sub> hydrolysis upon addition of 50 μM 11-*cis*-retinal. Scale bar 10 μm.

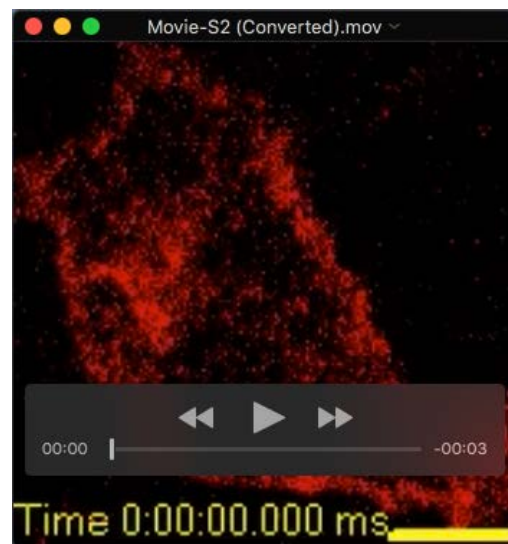

**Movie-S2.** A HeLa cell expressing Opn4 and mCh- $\gamma_9$  shows  $\gamma_9$  translocation upon addition of 50 μM 11-*cis*-retinal while photoactivation at 515 nm. Scale bar 10 μm.

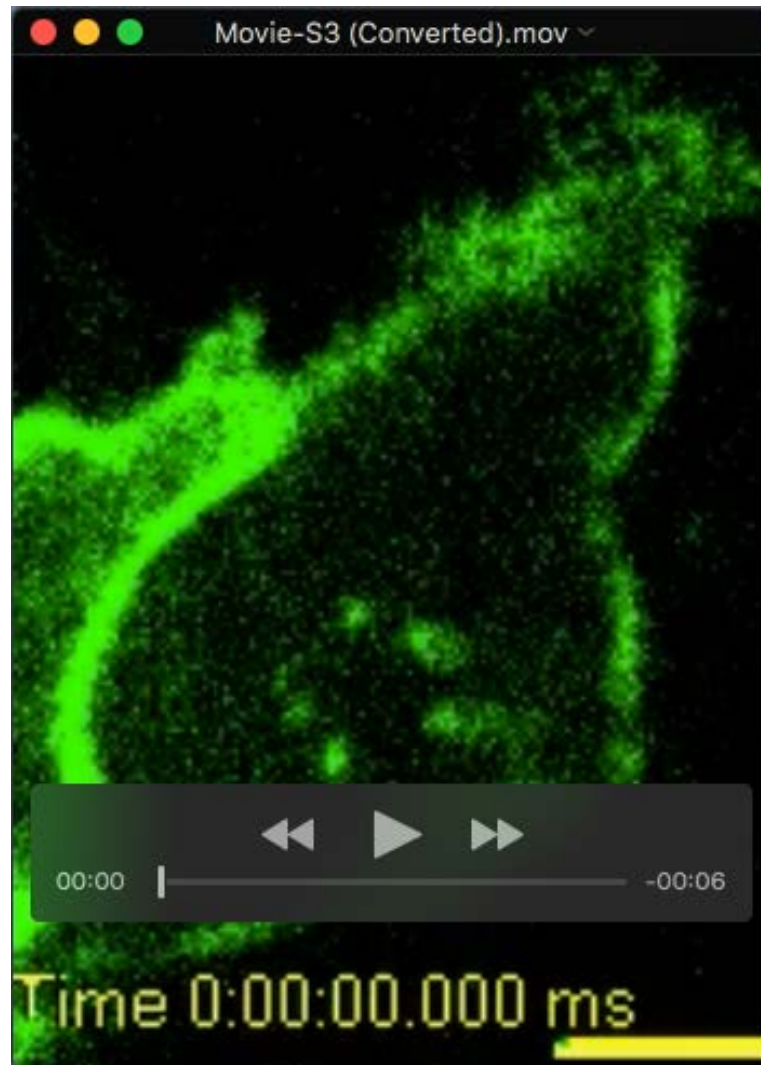

**Movie-S3.** A HeLa cell expressing GRPR and and PIP<sub>2</sub> sensor (Venus-PH) shows profound PIP<sub>2</sub> hydrolysis upon addition of 1 μM bombesin. Scale bar 10 μm.



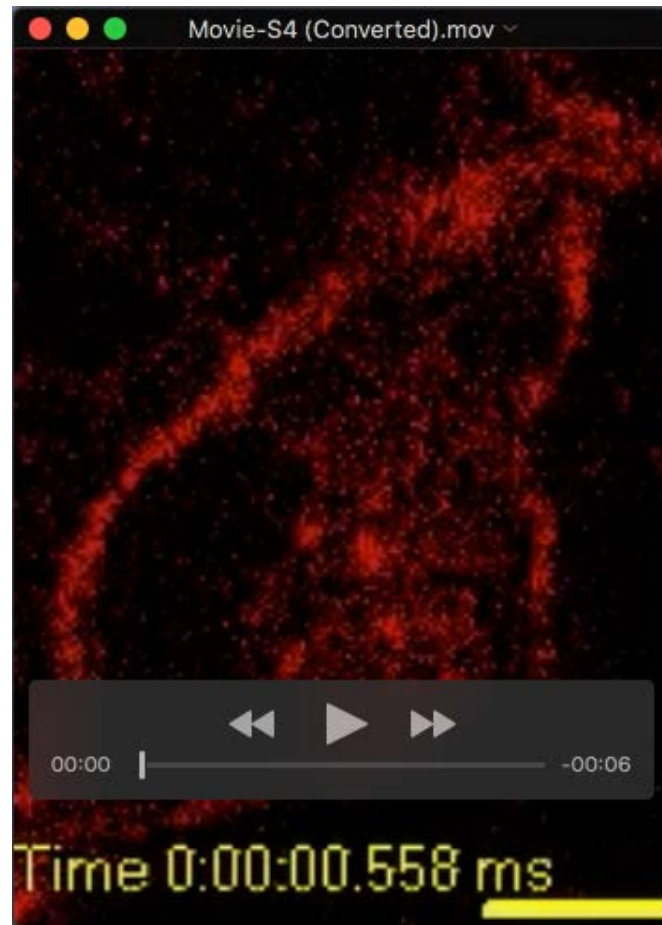

**Movie-S4.** A HeLa cell expressing GRPR and mCherry- $\gamma_9$  does not exhibit  $\gamma_9$  translocation upon addition of 1  $\mu$ M bombesin. Scale bar 10  $\mu$ m.

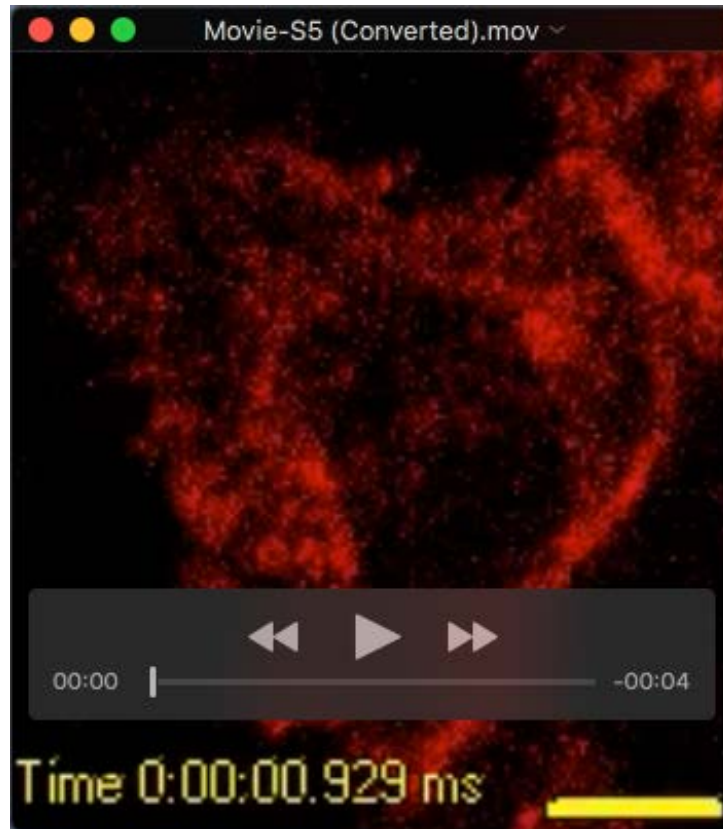

**Movie-S5.** A HeLa cell endogenously expressing  $\alpha_2$ -AR and mCherry-  $\gamma_9$  shows  $\gamma_9$  translocation upon addition of 100  $\mu$ M nor-epinephrine. Scale bar 10  $\mu$ m.
